# Supplementary material for: Untapped power of food system by-products to increase global food supply
Source: Research Square preprint supplement (doi:10.21203/rs.3.rs-990009/v1), 2021-11-01
Supplement: Supplementary file 1 [file 71dba5eb302d513c2a3fa231.xlsx]

## Sheet: Readme
	Supplementary data
	Untapped power of food systems’ by-products to increase global food supply
	[Author names and affiliations anonymized for peer-review]
	This file contains outputs of the replacement scenarios.
	For the source data and methods please refer to the original research article.
	Units: t (unless otherwise noted)
	Food system by-produt abbreviations used:
	bran	Cereal brans, hulls
	mola	Sugarcane and sugar beet molasses
	pulp	Sugar beet pulp
	crop_res	Crop residues
	blood_meal_pig	Blood meal from pig slaughtering
	blood_meal_poultry	Blood meal from poultry slaughtering
	hydrolyzed_feather_meal	Hydrolyzed feather meal
	meat_meal_hog_ovine	Meat meal from pig production
	oilseed_meals	Oilseed meals
	fmbp	Fishmeal from fish by-products
	fobp	Fish oil from fish by-products
	poultry_oil	Poultry oil

## Sheet: cereals
feed_material	RegionName	Feed use												By-product availability						Replacement potential for individual animal production groups												Total replacement potential		Increased food supply
		eggs_min	cattle_meat_min	pig_min	poultry_meat_min	dairy_min	fish_min	eggs_max	cattle_meat_max	pig_max	poultry_meat_max	dairy_max	fish_max	bran_5th	bran_95th	mola_5th	mola_95th	pulp_5th	pulp_95th	cattle_total_max	cattle_total_min	dairy_total_max	dairy_total_min	eggs_total_max	eggs_total_min	pig_total_max	pig_total_min	poultry_meat_total_max	poultry_meat_total_min	fish_total_max	fish_total_min	total_max	total_min	increased_kcal_max	increased_kcal_min	increased_prot_max (g)	increased_prot_min (g)	increased_fat_max (g)	increased_fat_min (g)
cereals	Caribbean	346152	6175.54	350994	685353	808153	74190.2	485208	8563.34	484631	954358	1.11701e+06	103998	15187.4	141342	534256	577166	0	0	3098.16	1146.74	404126	150066	30964.6	7526.51	120177	25181.5	60904.4	14901.9	0	0	619270	198823	2.63544e+12	8.46133e+11	6.76775e+10	2.17286e+10	1.83124e+10	5.87939e+09
cereals	Central America	4.39733e+06	68742	4.02789e+06	3.1354e+06	5.78194e+06	754125	6.15004e+06	95522	5.49349e+06	4.39286e+06	8.00375e+06	1.05608e+06	0	0	2.17023e+06	2.62089e+06	0	0	25210.6	11686.1	2.11239e+06	982930	123001	87946.6	1.19744e+06	281952	87857.2	62708	0	0	3.5459e+06	1.42722e+06	1.50903e+13	6.07385e+12	3.87517e+11	1.55975e+11	1.04856e+11	4.22044e+10
cereals	Central Asia	1.13904e+06	21144.4	148472	247785	334491	169671	1.57755e+06	29622.4	207684	343096	466603	234114	1.24232e+06	1.57821e+06	0	0	81934.1	81934.1	19007.6	13674.8	299402	216327	672822	86135.2	64987.6	14565.9	146330	18737.7	0	0	1.20255e+06	349441	5.11771e+12	1.48712e+12	1.31422e+11	3.8189e+10	3.55606e+10	1.03333e+10
cereals	Eastern Africa	666107	57562.6	1.14754e+06	1.47717e+06	1.09148e+06	265525	926917	79921.2	1.58986e+06	2.0477e+06	1.51532e+06	370043	1.38197e+06	2.04658e+06	1.04173e+06	1.11999e+06	0	0	63228.6	35688.8	1.19883e+06	676715	341347	46627.5	592819	137705	754088	103402	0	0	2.95031e+06	1.00014e+06	1.25557e+13	4.2563e+12	3.22427e+11	1.09301e+11	8.72436e+10	2.95751e+10
cereals	Eastern Asia	3.92621e+07	1.00943e+07	1.52036e+07	1.80023e+08	3.42821e+07	1.57367e+06	5.51913e+07	1.40119e+07	2.12667e+07	2.52508e+08	4.75582e+07	2.21311e+06	1.96206e+07	2.56916e+07	3.32658e+06	3.47162e+06	200821	200821	1.99045e+06	3.5379e+06	6.75584e+06	1.20153e+07	4.63643e+06	2.0048e+06	3.68771e+06	1.08745e+06	2.12123e+07	9.19231e+06	0	0	3.82827e+07	2.78377e+07	1.6292e+14	1.18469e+14	4.18376e+12	3.04228e+12	1.13206e+12	8.2319e+11
cereals	Eastern Europe	8.80552e+06	101827	1.94708e+06	1.44388e+07	1.1746e+07	7.7774e+06	1.23764e+07	141677	2.69708e+06	2.01371e+07	1.62561e+07	1.07245e+07	707360	3.10037e+06	3371950	3371950	1.28026e+06	2.19962e+06	52129.7	32420.8	5.98142e+06	3.73983e+06	1.13749e+06	248545	651033	174586	1.85076e+06	407550	0	0	9.67283e+06	4.60293e+06	4.11648e+13	1.95887e+13	1.05711e+12	5.03036e+11	2.86035e+11	1.36113e+11
cereals	Middle Africa	62272.1	2323.46	382665	428844	198308	14411.7	86852.2	3197.63	530625	599381	277507	20169	289812	406562	57459.8	72526.9	0	0	1917.35	1440.55	166397	122951	28903.6	4359.04	165108	45919.8	199468	30019.1	0	0	561795	204690	2.39084e+12	8.711e+11	6.13963e+10	2.23697e+10	1.66128e+10	6.05288e+09
cereals	Northern Africa	1.89913e+06	496873	205241	3326.38	3.13383e+06	120091	2.64068e+06	684354	287662	4627	4.36313e+06	166125	5.81668e+06	6.23288e+06	1.24852e+06	1.27627e+06	966355	966355	664397	437331	4.2359e+06	2.75829e+06	1.16477e+06	147056	119635	32257	2040.9	257.573	0	0	6.18674e+06	3.37519e+06	2.6329e+13	1.43638e+13	6.76124e+11	3.68861e+11	1.82948e+11	9.98077e+10
cereals	Northern America	7.46671e+06	121061	2.8499e+07	2.80863e+07	3.53824e+07	1.01187e+07	1.03871e+07	167472	3.99581e+07	3.8393e+07	4.86985e+07	1.39863e+07	9.51046e+06	1.05855e+07	2.33756e+06	2.33756e+06	1.86005e+06	1.86005e+06	29546.1	39009.8	8.59159e+06	1.14014e+07	1.07917e+06	344238	7.26411e+06	1.90961e+06	3.98885e+06	1.29486e+06	0	0	2.09533e+07	1.49891e+07	8.91711e+13	6.37893e+13	2.2899e+12	1.6381e+12	6.19609e+11	4.43243e+11
cereals	Northern Europe	1.38837e+06	315039	4.33208e+06	6.73306e+06	4.95768e+06	3.00812e+06	1.94385e+06	430250	5.99669e+06	9.24281e+06	6.92723e+06	4.1886e+06	0	0	0	0	0	0	0	0	0	0	38877	27767.5	779569	86641.7	184856	134661	0	0	1.0033e+06	249070	4.26977e+12	1.05997e+12	1.09647e+11	2.72199e+10	2.96687e+10	7.36526e+09
cereals	Oceania	302279	16822	4.59586e+06	1.15807e+06	2.42521e+06	2.13543e+06	420411	23216.2	6.44364e+06	1.59181e+06	3.42389e+06	2.97738e+06	0	0	944438	989052	0	0	4104.03	2859.74	605257	412286	8408.22	6045.58	1.21736e+06	321710	31836.1	23161.4	0	0	1.86697e+06	766063	7.94529e+12	3.26015e+12	2.04034e+11	8.372e+10	5.52082e+10	2.26533e+10
cereals	South-Eastern Asia	6.51422e+06	4.67186e+06	2.90962e+06	2.26387e+07	1.5786e+07	306716	9.01334e+06	6.5185e+06	4.04768e+06	3.13953e+07	2.18352e+07	425314	1.60008e+07	1.79057e+07	7.57501e+06	7.65171e+06	0	0	3.68521e+06	2.89655e+06	1.23445e+07	9.78729e+06	2.14711e+06	455995	1.23613e+06	349155	7.47882e+06	1.58471e+06	0	0	2.68917e+07	1.50737e+07	1.14444e+14	6.41494e+13	2.93889e+12	1.64734e+12	7.95216e+11	4.45744e+11
cereals	South America	7.32008e+06	868787	2.50723e+07	1.15798e+07	2.98895e+07	3.01896e+06	1.01823e+07	1.20587e+06	3.49174e+07	1.62079e+07	4.18302e+07	4.15579e+06	0	0	7.66416e+06	1.01649e+07	104688	104688	226422	150301	7.85431e+06	5.17092e+06	207041	147029	6.71931e+06	1.76581e+06	329561	232588	0	0	1.53366e+07	7.46665e+06	6.52684e+13	3.17759e+13	1.67608e+12	8.16e+11	4.5352e+11	2.20796e+11
cereals	Southern Africa	671537	445.569	576619	599978	2.49374e+06	87613.2	928955	616.64	808271	844910	3.39657e+06	120921	114853	384865	910642	942225	0	0	206.992	94.7037	1.14015e+06	530034	70421.3	16605.3	192816	43089.2	64050.1	14835.8	0	0	1.46764e+06	604659	6.24587e+12	2.57326e+12	1.60393e+11	6.60808e+10	4.33997e+10	1.78804e+10
cereals	Southern Asia	1.0811e+07	2.25044e+06	0	541033	1.22456e+07	3.34349e+06	1.50187e+07	3.16275e+06	0	743342	1.7013e+07	4.67236e+06	9.43435e+06	1.60238e+07	1.12854e+07	1.22053e+07	389595	389595	2.6188e+06	1.45443e+06	1.40871e+07	7.91416e+06	5.78903e+06	764887	0	0	286524	38278.7	0	0	2.27814e+07	1.01718e+07	9.69512e+13	4.32881e+13	2.48969e+12	1.11163e+12	6.73669e+11	3.00789e+11
cereals	Southern Europe	2.21294e+06	53715.4	3.77594e+06	1.31186e+07	6.94056e+06	2.00297e+06	3.11113e+06	75155.6	5.2143e+06	1.80378e+07	9.6173e+06	2.81007e+06	2.94159e+06	3.84087e+06	0	0	0	0	11015.2	17330.5	1.40956e+06	2.23928e+06	385557	123589	900183	210881	2.23539e+06	732655	0	0	4.94171e+06	3.32374e+06	2.10305e+13	1.41449e+13	5.4006e+11	3.63238e+11	1.46131e+11	9.82862e+10
cereals	Western Africa	1.09748e+06	187073	548971	1.02291e+06	842788	72244.4	1.53112e+06	260167	766976	1.41418e+06	1.17077e+06	100838	4.49748e+06	4.74845e+06	74931.9	107219	0	0	159631	95949.5	718352	432264	627760	76823.3	238676	48583.6	579815	71603.4	0	0	2.32423e+06	725224	9.89128e+12	3.08635e+12	2.54006e+11	7.92569e+10	6.87299e+10	2.14456e+10
cereals	Western Asia	2.89873e+06	83194	223493	125370	5.13922e+06	222280	4.05103e+06	116217	312397	175330	7.13473e+06	314235	2.93191e+06	3.4288e+06	686405	741373	1.1191e+06	1.1191e+06	66334.6	65668.4	4.07236e+06	4.0566e+06	1.13457e+06	220265	92051.5	30866.9	49104.4	9526.49	0	0	5.41442e+06	4.38292e+06	2.30422e+13	1.86525e+13	5.9172e+11	4.78992e+11	1.6011e+11	1.29607e+11
cereals	Western Europe	2.93932e+06	18710.5	7.84858e+06	2.0864e+07	9.27529e+06	6.59759e+06	4.10224e+06	25823.8	1.08507e+07	2.91116e+07	1.29303e+07	9.08162e+06	0	0	1.06719e+06	1.503e+06	450434	1.50522e+06	4137.59	2480.57	2.07174e+06	1.22969e+06	133389	62195.8	1.92723e+06	414817	946598	441480	0	0	5.0831e+06	2.15066e+06	2.16322e+13	9.1526e+12	5.55511e+11	2.35037e+11	1.50312e+11	6.35972e+10

## Sheet: cereals with crop residues
feed_material	RegionName	Feed use												By-product availability								Replacement potential for individual animal production groups														Increased food supply
		eggs_min	cattle_meat_min	pig_min	poultry_meat_min	dairy_min	fish_min	eggs_max	cattle_meat_max	pig_max	poultry_meat_max	dairy_max	fish_max	crop_res_5th	crop_res_95th	bran_5th	bran_95th	mola_5th	mola_95th	pulp_5th	pulp_95th	cattle_total_max	cattle_total_min	dairy_total_max	dairy_total_min	eggs_total_max	eggs_total_min	pig_total_max	pig_total_min	poultry_meat_total_max	poultry_meat_total_min	fish_total_max	fish_total_min	total_max	total_min	increased_kcal_max	increased_kcal_min	increased_prot_max (g)	increased_prot_min (g)	increased_fat_max (g)	increased_fat_min (g)
cereals	Caribbean	346152	6175.54	350994	685353	808153	74190.2	485208	8563.34	484631	954358	1.11701e+06	103998	5.02469e+06	7.71283e+06	15187.4	141342	534256	577166	0	0	8563.34	5778.39	1.11701e+06	756181	30964.6	7526.51	120177	25181.5	60904.4	14901.9	0	0	1.33762e+06	809569	5.69251e+12	3.44529e+12	1.46183e+11	8.84746e+10	3.95546e+10	2.39398e+10
cereals	Central America	4.39733e+06	68742	4.02789e+06	3.1354e+06	5.78194e+06	754125	6.15004e+06	95522	5.49349e+06	4.39286e+06	8.00375e+06	1.05608e+06	5.04127e+07	7.76603e+07	0	0	2.17023e+06	2.62089e+06	0	0	95522	63242.7	8.00375e+06	5.31939e+06	123001	87946.6	1.19744e+06	281952	87857.2	62708	0	0	9.50757e+06	5.81523e+06	4.04615e+13	2.4748e+13	1.03904e+12	6.35524e+11	2.81148e+11	1.71962e+11
cereals	Central Asia	1.13904e+06	21144.4	148472	247785	334491	169671	1.57755e+06	29622.4	207684	343096	466603	234114	2.73881e+06	1.40555e+07	1.24232e+06	1.57821e+06	0	0	81934.1	81934.1	29622.4	21144.4	466603	334491	672822	86135.2	64987.6	14565.9	146330	18737.7	0	0	1.38037e+06	475074	5.87444e+12	2.02178e+12	1.50855e+11	5.1919e+10	4.08188e+10	1.40484e+10
cereals	Eastern Africa	666107	57562.6	1.14754e+06	1.47717e+06	1.09148e+06	265525	926917	79921.2	1.58986e+06	2.0477e+06	1.51532e+06	370043	6.58659e+07	9.46572e+07	1.38197e+06	2.04658e+06	1.04173e+06	1.11999e+06	0	0	79921.2	57562.6	1.51532e+06	1.09148e+06	341347	46627.5	592819	137705	754088	103402	0	0	3.2835e+06	1.43677e+06	1.39736e+13	6.11449e+12	3.5884e+11	1.57019e+11	9.70963e+10	4.24868e+10
cereals	Eastern Asia	3.92621e+07	1.00943e+07	1.52036e+07	1.80023e+08	3.42821e+07	1.57367e+06	5.51913e+07	1.40119e+07	2.12667e+07	2.52508e+08	4.75582e+07	2.21311e+06	3.48338e+08	5.68192e+08	1.96206e+07	2.56916e+07	3.32658e+06	3.47162e+06	200821	200821	1.40119e+07	1.00943e+07	4.75582e+07	3.42821e+07	4.63643e+06	2.0048e+06	3.68771e+06	1.08745e+06	2.12123e+07	9.19231e+06	0	0	9.11066e+07	5.6661e+07	3.87723e+14	2.41133e+14	9.95667e+12	6.19225e+12	2.69411e+12	1.67552e+12
cereals	Eastern Europe	8.80552e+06	101827	1.94708e+06	1.44388e+07	1.1746e+07	7.7774e+06	1.23764e+07	141677	2.69708e+06	2.01371e+07	1.62561e+07	1.07245e+07	1.44766e+08	2.01707e+08	707360	3.10037e+06	3371950	3371950	1.28026e+06	2.19962e+06	141677	101827	1.62561e+07	1.1746e+07	1.13749e+06	248545	651033	174586	1.85076e+06	407550	0	0	2.00371e+07	1.26785e+07	8.52722e+13	5.3956e+13	2.18977e+12	1.38558e+12	5.92517e+11	3.74915e+11
cereals	Middle Africa	62272.1	2323.46	382665	428844	198308	14411.7	86852.2	3197.63	530625	599381	277507	20169	2.29928e+07	3.26998e+07	289812	406562	57459.8	72526.9	0	0	3197.63	2323.46	277507	198308	28903.6	4359.04	165108	45919.8	199468	30019.1	0	0	674184	280930	2.86913e+12	1.19556e+12	7.36789e+10	3.07017e+10	1.99363e+10	8.30737e+09
cereals	Northern Africa	1.89913e+06	496873	205241	3326.38	3.13383e+06	120091	2.64068e+06	684354	287662	4627	4.36313e+06	166125	2.10915e+07	4.0312e+07	5.81668e+06	6.23288e+06	1.24852e+06	1.27627e+06	966355	966355	684354	496873	4.36313e+06	3.13383e+06	1.16477e+06	147056	119635	32257	2040.9	257.573	0	0	6.33393e+06	3.81027e+06	2.69554e+13	1.62154e+13	6.9221e+11	4.16409e+11	1.87301e+11	1.12674e+11
cereals	Northern America	7.46671e+06	121061	2.8499e+07	2.80863e+07	3.53824e+07	1.01187e+07	1.03871e+07	167472	3.99581e+07	3.8393e+07	4.86985e+07	1.39863e+07	2.31229e+08	3.18131e+08	9.51046e+06	1.05855e+07	2.33756e+06	2.33756e+06	1.86005e+06	1.86005e+06	167472	121061	4.86985e+07	3.53824e+07	1.07917e+06	344238	7.26411e+06	1.90961e+06	3.98885e+06	1.29486e+06	0	0	6.11981e+07	3.90522e+07	2.60442e+14	1.66195e+14	6.6881e+12	4.26786e+12	1.80969e+12	1.15481e+12
cereals	Northern Europe	1.38837e+06	315039	4.33208e+06	6.73306e+06	4.95768e+06	3.00812e+06	1.94385e+06	430250	5.99669e+06	9.24281e+06	6.92723e+06	4.1886e+06	1.32774e+07	2.1504e+07	0	0	0	0	0	0	430250	236279	6.92723e+06	3.71826e+06	38877	27767.5	779569	86641.7	184856	134661	0	0	8.36079e+06	4.20361e+06	3.55811e+13	1.78894e+13	9.13717e+11	4.59396e+11	2.47237e+11	1.24305e+11
cereals	Oceania	302279	16822	4.59586e+06	1.15807e+06	2.42521e+06	2.13543e+06	420411	23216.2	6.44364e+06	1.59181e+06	3.42389e+06	2.97738e+06	2.14989e+07	2.99575e+07	0	0	944438	989052	0	0	23216.2	15476.2	3.42389e+06	2.2312e+06	8408.22	6045.58	1.21736e+06	321710	31836.1	23161.4	0	0	4.70471e+06	2.59759e+06	2.00219e+13	1.10546e+13	5.14159e+11	2.8388e+11	1.39123e+11	7.68133e+10
cereals	South-Eastern Asia	6.51422e+06	4.67186e+06	2.90962e+06	2.26387e+07	1.5786e+07	306716	9.01334e+06	6.5185e+06	4.04768e+06	3.13953e+07	2.18352e+07	425314	1.26398e+08	2.0777e+08	1.60008e+07	1.79057e+07	7.57501e+06	7.65171e+06	0	0	6.5185e+06	4.67186e+06	2.18352e+07	1.5786e+07	2.14711e+06	455995	1.23613e+06	349155	7.47882e+06	1.58471e+06	0	0	3.92157e+07	2.28477e+07	1.66891e+14	9.72332e+13	4.28573e+12	2.49693e+12	1.15965e+12	6.75629e+11
cereals	South America	7.32008e+06	868787	2.50723e+07	1.15798e+07	2.98895e+07	3.01896e+06	1.01823e+07	1.20587e+06	3.49174e+07	1.62079e+07	4.18302e+07	4.15579e+06	2.68789e+08	4.20791e+08	0	0	7.66416e+06	1.01649e+07	104688	104688	1.20587e+06	801892	4.18302e+07	2.7588e+07	207041	147029	6.71931e+06	1.76581e+06	329561	232588	0	0	5.02919e+07	3.05353e+07	2.14028e+14	1.2995e+14	5.4962e+12	3.33709e+12	1.48718e+12	9.02961e+11
cereals	Southern Africa	671537	445.569	576619	599978	2.49374e+06	87613.2	928955	616.64	808271	844910	3.39657e+06	120921	1.84692e+07	2.76203e+07	114853	384865	910642	942225	0	0	616.64	428.88	3.39657e+06	2.40034e+06	70421.3	16605.3	192816	43089.2	64050.1	14835.8	0	0	3.72447e+06	2.4753e+06	1.58503e+13	1.05342e+13	4.07033e+11	2.70516e+11	1.10136e+11	7.31971e+10
cereals	Southern Asia	1.0811e+07	2.25044e+06	0	541033	1.22456e+07	3.34349e+06	1.50187e+07	3.16275e+06	0	743342	1.7013e+07	4.67236e+06	1.14148e+08	3.16187e+08	9.43435e+06	1.60238e+07	1.12854e+07	1.22053e+07	389595	389595	3.16275e+06	2.25044e+06	1.7013e+07	1.22456e+07	5.78903e+06	764887	0	0	286524	38278.7	0	0	2.62513e+07	1.52992e+07	1.11718e+14	6.51088e+13	2.8689e+12	1.67198e+12	7.76278e+11	4.52411e+11
cereals	Southern Europe	2.21294e+06	53715.4	3.77594e+06	1.31186e+07	6.94056e+06	2.00297e+06	3.11113e+06	75155.6	5.2143e+06	1.80378e+07	9.6173e+06	2.81007e+06	2.26691e+07	3.38219e+07	2.94159e+06	3.84087e+06	0	0	0	0	75155.6	53715.4	9.6173e+06	6.94056e+06	385557	123589	900183	210881	2.23539e+06	732655	0	0	1.32136e+07	8.06141e+06	5.62332e+13	3.4307e+13	1.44406e+12	8.80999e+11	3.90739e+11	2.38384e+11
cereals	Western Africa	1.09748e+06	187073	548971	1.02291e+06	842788	72244.4	1.53112e+06	260167	766976	1.41418e+06	1.17077e+06	100838	7.60144e+07	1.07337e+08	4.49748e+06	4.74845e+06	74931.9	107219	0	0	260167	187073	1.17077e+06	842788	627760	76823.3	238676	48583.6	579815	71603.4	0	0	2.87719e+06	1.22687e+06	1.22445e+13	5.22122e+12	3.14437e+11	1.3408e+11	8.50814e+10	3.62798e+10
cereals	Western Asia	2.89873e+06	83194	223493	125370	5.13922e+06	222280	4.05103e+06	116217	312397	175330	7.13473e+06	314235	4.2729e+06	2.05892e+07	2.93191e+06	3.4288e+06	686405	741373	1.1191e+06	1.1191e+06	116217	83194	7.13473e+06	5.13922e+06	1.13457e+06	220265	92051.5	30866.9	49104.4	9526.49	0	0	8.52667e+06	5.48307e+06	3.62871e+13	2.33344e+13	9.31845e+11	5.99223e+11	2.52142e+11	1.6214e+11
cereals	Western Europe	2.93932e+06	18710.5	7.84858e+06	2.0864e+07	9.27529e+06	6.59759e+06	4.10224e+06	25823.8	1.08507e+07	2.91116e+07	1.29303e+07	9.08162e+06	3.16609e+07	4.99922e+07	0	0	1.06719e+06	1.503e+06	450434	1.50522e+06	25823.8	16513.4	1.29303e+07	8.18616e+06	133389	62195.8	1.92723e+06	414817	946598	441480	0	0	1.59633e+07	9.12116e+06	6.79352e+13	3.88171e+13	1.74456e+12	9.96815e+11	4.72051e+11	2.69722e+11

## Sheet: fishmeal
feed_material	RegionName	Feed use								By-product availability													Replacement potential for individual animal production groups								Total replacement potential		Increased food supply
		eggs_min	pig_min	poultry_meat_min	fish_min	eggs_max	pig_max	poultry_meat_max	fish_max	blood_meal_pig_5th	blood_meal_pig_95th	blood_meal_poultry_5th	blood_meal_poultry_95th	hydrolyzed_feather_meal_5th	hydrolyzed_feather_meal_95th	meat_meal_hog_ovine_5th	meat_meal_hog_ovine_95th	poultry_byproduct_meal_5th	poultry_byproduct_meal_95th	oilseed_meals_5th	oilseed_meals_95th	fmbp	eggs_total_max	eggs_total_min	pig_total_max	pig_total_min	poultry_meat_total_max	poultry_meat_total_min	fish_total_max	fish_total_min	total_max	total_min	increased_kcal_max	increased_kcal_min	increased_prot_max	increased_prot_min	increased_fat_max	increased_fat_min
fish	Caribbean	213.194	1073.84	2514.95	534.153	299.349	1483.15	3506.36	738.248	5300.66	5300.71	9293.78	9293.83	46728.1	65354.3	25923.6	36687.7	74412.4	111495	0	0	2485.59	299.349	213.194	1483.15	1073.84	3506.36	2514.95	738.248	534.153	6027.11	4336.14	1.07885e+11	7.76168e+10	1.58212e+10	1.13824e+10	4.52034e+09	3.2521e+09
fish	Central America	2709.84	15145.9	11515.4	3821.33	3794.57	20987.1	16091.5	5289.49	23132.1	23209.5	63711.9	63789.4	321271	449948	106844	156519	507109	713135	0	0	23965.4	3794.57	2709.84	20987.1	15145.9	16091.5	11515.4	5289.49	3821.33	46162.7	33192.5	8.26313e+11	5.94145e+11	1.21177e+11	8.71303e+10	3.4622e+10	2.48944e+10
fish	Central Asia	666.055	1423.65	903.38	219.819	923.041	1992.3	1249.46	306.72	2027.8	2039.24	4136.09	4147.53	21666.3	30057.8	10338.1	14473.9	33621.9	50043.7	0	0	1600.23	923.041	666.055	1992.3	1423.65	1249.46	903.38	306.72	219.819	4471.52	3212.91	8.00401e+10	5.75111e+10	1.17377e+10	8.43389e+09	3.35364e+09	2.40968e+09
fish	Eastern Africa	195.188	5403.39	3117.85	585.45	272.432	7498.72	4325.41	812.773	9045.62	9053.58	12127.6	12135.5	57213.2	82943.4	25609	49317.2	97112.8	144777	0	0	22938.7	272.432	195.188	7498.72	5403.39	4325.41	3117.85	812.773	585.45	12909.3	9301.87	2.31077e+11	1.66503e+11	3.3887e+10	2.44174e+10	9.682e+09	6.9764e+09
fish	Eastern Asia	28656.5	1.49618e+06	391878	22662.6	40330.6	2.07772e+06	540362	31442.4	823990	824870	351558	352438	1.81222e+06	2.52445e+06	4.13376e+06	5.78862e+06	2.83103e+06	4.25103e+06	0	0	1.43828e+06	40330.6	28656.5	1.62456e+06	1.47179e+06	540362	391878	31442.4	22662.6	2.23669e+06	1.91498e+06	4.00367e+13	3.42782e+13	5.87131e+12	5.02683e+12	1.67752e+12	1.43624e+12
fish	Eastern Europe	3910.97	14100.9	47027.7	7853.14	5523.2	19594.2	65503	10869.4	113667	114266	133648	134247	677703	951261	578784	810433	1.08169e+06	1.61764e+06	1.37859e+07	8.25208e+06	94586.3	5523.2	3910.97	19594.2	14100.9	65503	47027.7	10869.4	7853.14	101490	72892.7	1.81667e+12	1.30478e+12	2.66411e+11	1.91343e+11	7.61174e+10	5.46695e+10
fish	Middle Africa	18.3272	185.46	909.89	106.386	25.5045	255.26	1265.63	148.883	2592.87	2592.87	2105.17	2105.17	10493.5	14762.6	12122.6	17535.3	17270.7	25247.8	0	0	11073.9	25.5045	18.3272	255.26	185.46	1265.63	909.89	148.883	106.386	1695.28	1220.06	3.03455e+10	2.18391e+10	4.45011e+09	3.20266e+09	1.27146e+09	9.15047e+08
fish	Northern Africa	1110.07	37505.8	11.9281	2052.11	1544.14	51834.4	16.4917	2857.1	0	0	38887.4	38899.7	56792.1	172785	0	0	311436	467162	0	0	44970.3	502.138	344.123	51834.4	37505.8	5.36294	3.6977	2857.1	2052.11	55199	39905.8	9.88063e+11	7.14313e+11	1.44897e+11	1.04753e+11	4.13993e+10	2.99293e+10
fish	Northern America	5296.91	34340.8	93667.2	26450	7368.67	47416.1	128040	36404.6	188727	190843	332448	334564	1.69201e+06	2.37639e+06	981879	1.37471e+06	2.70627e+06	4.0559e+06	2.31619e+07	1.28578e+07	131918	7368.67	5296.91	47416.1	34340.8	128040	93667.2	36404.6	26450	219229	159755	3.92421e+12	2.85961e+12	5.75477e+11	4.19357e+11	1.64422e+11	1.19816e+11
fish	Northern Europe	977.21	228073	29571.1	3418.5	1367.96	311811	40584.7	4776.81	47223.2	47968	37338.7	38083.5	193349	275583	248589	348541	311675	472021	0	0	167997	1367.96	977.21	194761	194093	40584.7	29571.1	4776.81	3418.5	241491	228060	4.32268e+12	4.08228e+12	6.33913e+11	5.98658e+11	1.81118e+11	1.71045e+11
fish	Oceania	212.854	11660	3122.78	1735.88	296.028	16076.7	4294.77	2450.8	6175.15	6618	20365.9	20808.8	109619	153772	20310.6	40970.6	159469	251855	0	0	25293.8	296.028	212.854	16076.7	11660	4294.77	3122.78	2450.8	1735.88	23118.3	16731.5	4.13818e+11	2.99494e+11	6.06856e+10	4.39203e+10	1.73387e+10	1.25487e+10
fish	South-Eastern Asia	4511.86	583956	52244.3	10520.3	6230.08	817140	72978.3	14544.8	118168	118186	151497	151514	703403	1.02546e+06	204187	552470	1.19991e+06	1.77241e+06	0	0	600377	6230.08	4511.86	717644	583956	72978.3	52244.3	14544.8	10520.3	811397	651232	1.4524e+13	1.16571e+13	2.12992e+12	1.70948e+12	6.08548e+11	4.88424e+11
fish	South America	4505.49	217928	42560.1	19755.2	6280.16	300917	59526.9	27646.8	40131.4	52852.6	275044	287765	1.44076e+06	2.13207e+06	381186	569364	2.46526e+06	3.77964e+06	3.74408e+07	2.41477e+07	124373	6280.16	4505.49	300917	217928	59526.9	42560.1	27646.8	19755.2	394371	284749	7.05923e+12	5.097e+12	1.03522e+12	7.47465e+11	2.95778e+11	2.13561e+11
fish	Southern Africa	197.258	435.716	1286.75	1337.42	270.025	605.371	1789.09	1826.06	3585.14	3614.41	25416.1	25445.4	128236	179382	18379.5	25776.9	203910	306063	67666.9	0	10094.9	270.025	197.258	605.371	435.716	1789.09	1286.75	1826.06	1337.42	4490.55	3257.14	8.03808e+10	5.83029e+10	1.17877e+10	8.55e+09	3.36791e+09	2.44286e+09
fish	Southern Asia	5389.75	297100	1539.13	7818.23	7439.12	415949	2093.14	10856.4	0	615.938	108444	110035	552090	789360	0	0	902670	1.35966e+06	0	0	238509	1901.17	1670.82	338195	297100	534.928	477.13	8527.8	6881.36	349159	306129	6.24995e+12	5.47972e+12	9.16543e+11	8.0359e+11	2.61869e+11	2.29597e+11
fish	Southern Europe	1556.8	36303.4	57536.5	4784.38	2188.25	50717	79101.9	6629.54	95542.6	96079.4	54087.8	54624.6	276014	389898	487126	682194	462715	663334	0	0	46392.2	2188.25	1556.8	50717	36303.4	79101.9	57536.5	6629.54	4784.38	138637	100181	2.4816e+12	1.79324e+12	3.63921e+11	2.62975e+11	1.03977e+11	7.51358e+10
fish	Western Africa	324.928	14250	2154.94	452.99	447.185	19810.4	2970.54	627.713	6114.87	6114.87	10159.5	10159.5	50776.4	72019.1	17589.7	33489.9	81275	121205	0	0	34028.3	447.185	324.928	19810.4	14250	2970.54	2154.94	627.713	452.99	23855.9	17182.9	4.2702e+11	3.07574e+11	6.26216e+10	4.51051e+10	1.78919e+10	1.28872e+10
fish	Western Asia	1707.14	49966.5	446.963	3364.14	2389.68	70009.1	626.024	4671.85	0	0	60168.7	61361.3	310326	443071	0	2269.2	534860	763486	882584	0	17009.3	214.248	1074.93	70009.1	49966.5	56.1266	281.436	4120.02	2972.9	74399.5	54295.7	1.33175e+12	9.71893e+11	1.95299e+11	1.42526e+11	5.57996e+10	4.07218e+10
fish	Western Europe	2068.73	7948.61	91637.6	6395.97	2887.13	10938.9	127854	8916.71	155634	155761	74661.3	74788.1	376598	527260	780390	1.09258e+06	599858	893852	0	0	30254.6	2887.13	2038.95	10938.9	7948.61	127854	90318.7	8916.71	6395.97	150596	106702	2.69568e+12	1.90997e+12	3.95316e+11	2.80093e+11	1.12947e+11	8.00267e+10

## Sheet: fish oil
feed_material	RegionName	Feed use		By-product availability			Total replacement potential		Increased food supply
		fish_min	fish_max	fobp	poultryoil_5th	poultryoil_95th	total_max	total_min	increased_kcal_max	increased_kcal_min	increased_prot_max (g)	increased_prot_min (g)	increased_fat_max (g)	increased_fat_min (g)
fish	Caribbean	87.6309	120.798	489.012	90529.3	128210	120.798	87.6309	1.08114e+10	7.84296e+09	1.58547e+09	1.15016e+09	4.52991e+08	3.28616e+08
fish	Central America	2297.4	3172.49	4714.92	639601	895691	3172.49	2297.4	2.83938e+11	2.05617e+11	4.1639e+10	3.01534e+10	1.18969e+10	8.61525e+09
fish	Central Asia	92.9779	130.227	314.826	41576.8	58332.6	130.227	92.9779	1.16553e+10	8.32152e+09	1.70923e+09	1.22034e+09	4.88351e+08	3.48667e+08
fish	Eastern Africa	193.997	269.704	4512.93	106189	158977	269.704	193.997	2.41385e+10	1.73627e+10	3.53987e+09	2.54621e+09	1.01139e+09	7.27488e+08
fish	Eastern Asia	137567	191000	282964	3.12478e+06	4.66374e+06	191000	137567	1.70945e+13	1.23122e+13	2.50687e+12	1.80557e+12	7.16249e+11	5.15876e+11
fish	Eastern Europe	5865.99	8143.96	18608.8	1.35527e+06	1.90035e+06	8143.96	5865.99	7.28885e+11	5.25006e+11	1.0689e+11	7.69911e+10	3.05399e+10	2.19975e+10
fish	Middle Africa	0	0	2178.65	20573.3	29135.3	0	0	0	0	0	0	0	0
fish	Northern Africa	2757.34	3856.69	8847.4	385159	542077	3856.69	2757.34	3.45174e+11	2.46782e+11	5.0619e+10	3.61902e+10	1.44626e+10	1.034e+10
fish	Northern America	12917.3	17871.9	25953.4	3.37579e+06	4.74324e+06	17871.9	12917.3	1.59953e+12	1.1561e+12	2.34568e+11	1.69539e+11	6.70196e+10	4.84398e+10
fish	Northern Europe	131028	179125	33051.5	396340	556873	174560	99875.8	1.56232e+13	8.93888e+12	2.29111e+12	1.31087e+12	6.54602e+11	3.74534e+11
fish	Oceania	5959.52	8214.5	4976.27	212554	302473	8214.5	5959.52	7.35198e+11	5.33377e+11	1.07815e+11	7.82187e+10	3.08044e+10	2.23482e+10
fish	South-Eastern Asia	45188.9	63266	118117	344120	1.30578e+06	63266	45188.9	5.6623e+12	4.0444e+12	8.30366e+11	5.93104e+11	2.37247e+11	1.69458e+11
fish	South America	71070.5	97907.5	24468.9	3.21461e+06	4.53186e+06	97907.5	60714.8	8.76272e+12	5.43398e+12	1.28504e+12	7.96882e+11	3.67153e+11	2.27681e+11
fish	Southern Africa	244.381	339.654	1986.05	255182	357279	339.654	244.381	3.03991e+10	2.18721e+10	4.45796e+09	3.2075e+09	1.2737e+09	9.16429e+08
fish	Southern Asia	32758.8	45632.7	46923.8	748293	1.34405e+06	45632.7	32758.8	4.08413e+12	2.93191e+12	5.9893e+11	4.29959e+11	1.71123e+11	1.22845e+11
fish	Southern Europe	11652.5	16242.5	9127.13	557874	782756	16242.5	11652.5	1.45371e+12	1.0429e+12	2.13183e+11	1.52939e+11	6.09095e+10	4.36968e+10
fish	Western Africa	1.18404	1.67988	6694.68	28483.2	90180.6	1.67988	1.18404	1.50349e+08	1.05972e+08	2.20484e+07	1.55406e+07	6.29954e+06	4.44017e+06
fish	Western Asia	16781.3	23550.8	3346.38	643223	899468	21951.5	11904.8	1.96466e+12	1.06548e+12	2.88114e+11	1.56251e+11	8.23182e+10	4.46432e+10
fish	Western Europe	3497.06	4798.52	5952.25	749239	1.0503e+06	4798.52	3497.06	4.29468e+11	3.12987e+11	6.29806e+10	4.58989e+10	1.79945e+10	1.3114e+10

## Sheet: oilseed oils
feed_material	RegionName	Feed use								By-product availability				Replacement potential for individual animal production groups								Total replacement potential		Increased food supply
		eggs_min	pig_min	poultry_meat_min	fish_min	eggs_max	pig_max	poultry_meat_max	fish_max	fobp_5th	fobp_95th	poultryoil_5th	poultryoil_95th	eggs_total_max	eggs_total_min	pig_total_max	pig_total_min	poultry_meat_total_max	poultry_meat_total_min	fish_total_max	fish_total_min	total_max	total_min	increased_kcal_max	increased_kcal_min	increased_prot_max (g)	increased_prot_min (g)	increased_fat_max (g)	increased_fat_min (g)
oilseed_oils	Caribbean	4205.02	128.205	10576.7	437.501	5891.55	177.072	14738.7	608.015	421.528	436.851	90476	128175	120.182	115.494	177.072	99.675	300.654	290.496	492.735	235.142	1090.64	740.807	1.02302e+10	6.94877e+09	0	0	1.08901e+09	7.39696e+08
oilseed_oils	Central America	53410.3	9139.2	48408.1	3201.91	74674.3	12743.1	67807	4436.21	2942.58	3347.42	638201	894761	1565.61	1376.7	12743.1	7089.97	1421.63	1247.77	3597.61	1715.51	19328	11430	1.81297e+11	1.07213e+11	0	0	1.9299e+10	1.14128e+10
oilseed_oils	Central Asia	76243.2	755.215	2517.69	2107.39	105660	1056.45	3480.1	2990.51	242.074	259.482	41519.3	58295	242.227	226.117	1056.45	568.651	7.97814	7.46679	2369.36	1081.02	3676.01	1883.25	3.4481e+10	1.76649e+10	0	0	3.6705e+09	1.88043e+09
oilseed_oils	Eastern Africa	2873.98	1233.9	0	1388.64	4011.34	1715.09	0	1926.75	4362.26	4397.46	106070	158899	2304.89	2155.49	1715.09	1233.9	0	0	1926.75	1388.64	5946.73	4778.03	5.57803e+10	4.48179e+10	0	0	5.93781e+09	4.77087e+09
oilseed_oils	Eastern Asia	2.57565e+06	181270	1.26011e+06	570794	3.6247e+06	251666	1.76542e+06	795994	176261	201079	3.04049e+06	4.60806e+06	113215	98954.5	251666	142917	55141.7	48412.3	653698	313035	1.07372e+06	603318	1.00715e+13	5.65913e+12	0	0	1.07211e+12	6.02413e+11
oilseed_oils	Eastern Europe	127154	20244	20447.5	844270	177785	28117.9	28616.1	1.16925e+06	14059.1	15117.1	1.35167e+06	1.89797e+06	1914.56	1766.27	28117.9	15464.2	308.167	284.032	936296	442305	966637	459820	9.06705e+12	4.31311e+12	0	0	9.65187e+11	4.5913e+11
oilseed_oils	Middle Africa	269.853	39.5848	0	256.317	375.533	54.2854	0	355.326	2178.65	2178.65	20573.3	29135.3	375.533	202.389	54.2854	39.5848	0	0	355.326	256.317	785.145	498.292	7.36466e+09	4.67398e+09	0	0	7.83967e+08	4.97544e+08
oilseed_oils	Northern Africa	127070	1466.79	32.4177	24880.2	176757	2049.48	44.7799	34654	6692.82	7206.12	383457	540961	5965.81	5542.26	2049.48	1164.06	1.51139	1.41393	28546.3	13774.1	36563.1	20481.8	3.42962e+11	1.92119e+11	0	0	3.65082e+10	2.04511e+10
oilseed_oils	Northern America	63369.1	10088.6	0	244767	88154.3	14197.8	0	336875	15969.1	18264.5	3.36791e+06	4.73801e+06	3665.75	3179.98	14197.8	8072.71	0	0	280140	137114	298003	148367	2.79527e+12	1.39168e+12	0	0	2.97556e+11	1.48144e+11
oilseed_oils	Northern Europe	128866	412190	1218.94	314059	180396	563219	1697.46	438827	0	0	254831	490049	0	0	303338	167860	0	0	186711	86970.2	490049	254831	4.59666e+12	2.39031e+12	0	0	4.89314e+11	2.54448e+11
oilseed_oils	Oceania	19703.2	3668.65	0	109824	27402.3	5134.66	0	155028	1411.07	1428.93	207905	300061	208.759	208.734	5134.66	2790.35	0	0	123654	57173.9	128997	60173	1.20999e+12	5.64423e+11	0	0	1.28803e+11	6.00827e+10
oilseed_oils	South-Eastern Asia	371619	365755	160106	238326	512272	508239	221853	328108	82773.3	91219.2	316198	1.28749e+06	29754.8	27082.2	508239	245767	12886.1	11667.9	278263	114454	829143	398971	7.77736e+12	3.74235e+12	0	0	8.27899e+11	3.98373e+11
oilseed_oils	South America	88939.4	334257	178796	16245.4	123646	460527	250154	22733.5	939.264	0	3.14024e+06	4.49562e+06	0	135.122	460527	251200	0	271.637	17959.4	8309.81	478487	259917	4.48821e+12	2.43802e+12	0	0	4.77769e+11	2.59527e+11
oilseed_oils	Southern Africa	2904.45	839.416	0	3150.07	3975.89	1166.61	0	4324.02	1796.3	1840.59	255032	357180	773.036	756.791	1166.61	839.416	0	0	4256.7	2427.33	6196.35	4023.53	5.81218e+10	3.77407e+10	0	0	6.18706e+09	4.0175e+09
oilseed_oils	Southern Asia	15301.4	128883	2839.53	2879.93	21494.4	180145	3934.32	4045.02	21430.7	27424.6	728153	1.33079e+06	2812.13	2187.54	180145	115088	514.73	405.947	3724.78	1880.49	187196	119562	1.7559e+12	1.12149e+12	0	0	1.86915e+11	1.19382e+11
oilseed_oils	Southern Europe	205177	22167.1	3313.31	437063	288407	30723	4600.2	605649	2375.94	2191.14	548383	778039	679.96	730.077	30723	16704.2	10.8456	11.7897	479891	224458	511304	241904	4.79603e+12	2.26906e+12	0	0	5.10537e+11	2.41541e+11
oilseed_oils	Western Africa	4784.29	3060.35	0	1079.17	6584.43	4270.13	0	1485.6	6693.74	6693.98	28482.5	90180.1	3571.75	3588.22	4270.13	3060.35	0	0	1485.6	1079.17	9327.48	7727.73	8.74918e+10	7.24861e+10	0	0	9.31349e+09	7.71614e+09
oilseed_oils	Western Asia	193421	36380.7	1214.22	41276.4	270732	51157.4	1698.87	57145.8	0	0	624618	890909	0	0	51157.4	27285.5	0	0	45145.2	21051	96302.5	48336.5	9.03318e+11	4.53396e+11	0	0	9.61581e+10	4.8264e+10
oilseed_oils	Western Europe	272807	7522.82	3817.18	587949	380732	10364.9	5319.58	819450	3271.51	3870.66	747122	1.04888e+06	1212.04	1023.38	10364.9	5670.34	16.9347	14.3195	649974	302060	661568	308768	6.20551e+12	2.89624e+12	0	0	6.60576e+11	3.08305e+11

## Sheet: pulses
feed_material	RegionName	Feed use								By-product availability													Replacement potential for individual animal production groups								Total replacement potential		Increased food supply
		eggs_min	pig_min	poultry_meat_min	fish_min	eggs_max	pig_max	poultry_meat_max	fish_max	blood_meal_pig_5th	blood_meal_pig_95th	blood_meal_poultry_5th	blood_meal_poultry_95th	hydrolyzed_feather_meal_5th	hydrolyzed_feather_meal_95th	meat_meal_hog_ovine_5th	meat_meal_hog_ovine_95th	poultry_byproduct_meal_5th	poultry_byproduct_meal_95th	oilseed_meals_5th	oilseed_meals_95th	fmbp	eggs_total_max	eggs_total_min	pig_total_max	pig_total_min	poultry_meat_total_max	poultry_meat_total_min	fish_total_max	fish_total_min	total_max	total_min	increased_kcal_max	increased_kcal_min	increased_prot_max	increased_prot_min	increased_fat_max	increased_fat_min
pulses	Caribbean	15411.4	196.178	38237.1	2030.79	21297.3	270.664	53240.1	2836.99	2033.66	3258.61	8142.53	8645.11	44661.7	64404.7	25340.4	36543.5	73829.2	111351	0	0	876.739	21297.3	6914.25	152.886	97.1483	2449.73	1477.64	2836.99	2030.79	26736.9	10519.8	1.1684e+11	4.59717e+10	6.22971e+09	2.45112e+09	3.74317e+08	1.47278e+08
pulses	Central America	194863	3499.53	174873	14784.1	269765	4840.51	246385	20624.4	5931.25	12344.7	49511.8	55416.6	296105	437557	102665	155487	502930	712103	0	0	9203.63	269765	86049.2	2770.26	1810.58	8775.4	5523.91	20624.4	14307.9	301935	107692	1.31946e+12	4.70612e+11	7.03509e+10	2.50921e+10	4.22709e+09	1.50768e+09
pulses	Central Asia	57624	255.738	5001.8	1879.81	79627.7	358.193	6955.97	2609.98	170.453	857.929	2688.92	3362.27	19431.7	28930.7	10095.7	14414.6	33379.6	49984.4	0	0	433.219	79627.7	24094.2	199.291	120.078	90.6737	40.6555	2609.98	1499.5	82527.7	25754.4	3.60646e+11	1.12547e+11	1.92289e+10	6.00079e+09	1.15539e+09	3.60562e+08
pulses	Eastern Africa	166821	546.63	315942	93910.7	231652	763.297	437743	130388	5512.58	6586.91	8129.34	9311.3	49072.4	78732.8	24966.9	49159.1	96470.7	144619	0	0	17560.7	74280	30629.5	51.0524	66.8525	10979	8052.65	16618.8	18831.2	101929	57580.3	4.45429e+11	2.51626e+11	2.37494e+10	1.34162e+10	1.427e+09	8.06124e+08
pulses	Eastern Asia	309731	68620.1	0	186334	429272	95237.8	0	259068	341671	521781	573.741	1060.25	0	1.39619e+06	4.10892e+06	5.7825e+06	2.80619e+06	4.24491e+06	0	0	34888.5	429272	81004.4	5091.66	6865.38	0	0	259068	158581	693431	246451	3.0303e+12	1.07699e+12	1.6157e+11	5.74231e+10	9.70804e+09	3.45031e+09
pulses	Eastern Europe	32908.5	13881.8	238553	5544.55	45796.7	19304.2	334789	7719.4	81532.7	88442.4	124576	128213	649522	938565	570198	808313	1.07311e+06	1.61552e+06	1.37634e+07	8.21338e+06	73001.4	45796.7	32908.5	19304.2	13881.8	334789	238553	7719.4	5544.55	407609	290888	1.78125e+12	1.27118e+12	9.4973e+10	6.77769e+10	5.70653e+09	4.07243e+09
pulses	Middle Africa	15548.2	0	91414.1	17064.1	21719.1	0	128145	23862.4	1625.04	1913.85	1931.95	1990.17	10120.6	14594.7	12005	17506.5	17153.1	25219.1	0	0	10519.6	7756.87	3877.27	0	0	8213.65	6408.79	4817.88	6577.78	20788.4	16863.8	9.08453e+10	7.3695e+10	4.8437e+09	3.92928e+09	2.91038e+08	2.36094e+08
pulses	Northern Africa	96220.6	11170	72.7377	21856.2	133596	15624	103.044	30432.3	0	0	13382.1	19603.6	2700.58	144102	0	0	309179	466608	0	0	15276.6	133596	17526.5	5947.71	5813.39	8.06824	5.56985	18464.1	15471.7	158016	38817.2	6.90528e+11	1.69631e+11	3.68176e+10	9.0444e+09	2.21222e+09	5.4344e+08
pulses	Northern America	0	10424.4	0	0	0	14567.9	0	0	123269	138773	307787	318626	1.61583e+06	2.34349e+06	953120	1.36757e+06	2.67751e+06	4.04876e+06	2.31137e+07	1.27762e+07	84414.9	0	0	14567.9	10424.4	0	0	0	0	14567.9	10424.4	6.36617e+10	4.55548e+10	3.39432e+09	2.4289e+09	2.0395e+08	1.45942e+08
pulses	Northern Europe	4583.19	175612	1.44871e+06	2687.02	6446.44	243160	1.98823e+06	3719.45	9592.21	24912	0	748.101	0	103606	244815	347618	307901	471098	0	0	2093.16	2907.02	859.179	1019.89	571.356	26317.4	10812.2	330.594	267.591	30574.9	12510.3	1.33612e+11	5.46702e+10	7.12395e+09	2.91491e+09	4.28049e+08	1.75145e+08
pulses	Oceania	4579.26	48176	0	2719.8	6371.83	66258.3	0	3794.72	2145.57	3894.55	11577.1	14615.4	91606.1	144558	18374.5	40501.9	157532	251386	0	0	14993.9	6371.83	2513.64	26513.1	24376.9	0	0	3794.72	2719.8	36679.6	29610.4	1.6029e+11	1.29397e+11	8.54635e+09	6.89922e+09	5.13515e+08	4.14545e+08
pulses	South-Eastern Asia	110539	65466.2	440513	80815.3	155267	92161.9	619767	112361	49147.3	75475.5	794.44	1275.46	0	584650	192697	549630	1.18842e+06	1.76957e+06	0	0	8703.33	155267	23932.3	1417.28	2025.93	35839.9	16081.1	39218.3	36502.8	231742	78542.2	1.01271e+12	3.43229e+11	5.39959e+10	1.83003e+10	3.24439e+09	1.09959e+09
pulses	South America	327665	127043	644851	75441	448016	175111	902720	105841	11717.6	24663.1	147026	201330	1.118e+06	1.96329e+06	359345	564030	2.44342e+06	3.77431e+06	3.73376e+07	2.39662e+07	67887.4	448016	327665	175111	127043	902720	514500	105841	75441	1.63169e+06	1.04465e+06	7.13047e+12	4.56511e+12	3.80183e+11	2.43403e+11	2.28436e+10	1.46251e+10
pulses	Southern Africa	167897	672.176	126764	214608	233946	934.228	180493	289575	1555.2	2673.83	24554.3	25073	126188	178694	16936.9	25415.8	202467	305702	66793.7	0	8496.1	124247	61313.3	57.6104	152.549	2118.4	17773.3	31321.2	59932.9	157744	139172	6.89341e+11	6.08181e+11	3.67543e+10	3.24271e+10	2.20841e+09	1.94841e+09
pulses	Southern Asia	774091	152167	110141	145694	1.08739e+06	212209	151913	204635	0	615.938	0	12374.6	127565	564424	0	0	894093	1.35754e+06	0	0	2.91038e-11	927628	138304	4494.47	7.62486e-12	35.9391	1.76608e-12	8202.86	7.30053e-12	940361	138304	4.10938e+12	6.04388e+11	2.19104e+11	3.22248e+10	1.31651e+10	1.93625e+09
pulses	Southern Europe	7732.78	97740.7	2.80379e+06	4036.14	10928.5	136595	3.85427e+06	5610.68	25644.9	52539.3	18452.9	34916.7	220060	361379	481889	680903	457478	662043	0	0	13288.1	4911.37	2085.53	33087.1	18561.5	64519.5	36940.2	2954.53	1782.36	105473	59369.6	4.60915e+11	2.59445e+11	2.45751e+10	1.38331e+10	1.47662e+09	8.31174e+08
pulses	Western Africa	272873	2.40586	219517	71939.9	384333	3.41334	303480	100894	3446.71	4264.23	3439.75	3165.21	30470.1	61209.3	17093.8	33367.6	80779.1	121082	0	0	19560.4	104238	43936.9	0.167148	0.274065	8169.86	6468.31	8473.32	11937.7	120881	62343.2	5.2825e+11	2.7244e+11	2.81653e+10	1.4526e+10	1.69233e+09	8.72805e+08
pulses	Western Asia	142920	55017	2788.57	36211.7	198503	77162.7	3887.56	49719.6	0	0	1936.19	39791	236626	404688	0	2269.2	531169	762578	859836	0	842.306	198503	142920	18557.1	42522.2	8.81272	2096.88	21617.4	28392.9	238686	215932	1.04306e+12	9.43623e+11	5.56139e+10	5.03122e+10	3.34161e+09	3.02305e+09
pulses	Western Europe	9719.37	30612.7	4.48858e+06	5042.46	13572.8	41824.8	6.26295e+06	6939.69	40148.7	83925.1	63430.9	68716.1	358615	519572	773346	1.09086e+06	592814	892125	0	0	6373.71	5578.33	2617.55	23059.7	13908	89425.6	45605.7	6939.69	4467.55	125003	66598.8	5.46264e+11	2.91037e+11	2.91258e+10	1.55175e+10	1.75005e+09	9.32384e+08

## Sheet: combined replacement
Feed	Feed use	Feed use (5th)	Feed use (95th)	Replacement potential max (%)	Replacement potential min (%)	Increased kcal max (10^12 t)	Increased kcal min (10^12 t)	kcal_perc_use_max	kcal_perc_use_min	Increased prot max (10^12 g)	Increased prot min (10^12 g)	prot_perc_use_max	prot_perc_use_min	Increased fat max (10^9 g)	Increased fat min (10^9 g)	fat_perc_use_max	fat_perc_use_min
cereals	8.97718e+08	752756686.764953	1048441892.89007	0.163182	0.131383	728.095	420.889	0.0856052	0.0494857	18.6974	10.8084	0.0777728	0.044958	5059.2	2924.56	0.0203772	0.0117794
cereals (incl. also crop residues)	8.97718e+08	752756686.764953	1048441892.89007	0.350986	0.296073	1282.04	824.916	0.150734	0.0969888	21.3237	16.1951	0.0886972	0.0673646	-4410.24	-1571.02	-0.0177633	-0.00632767
fishmeal	4.8622e+06	4074726.19306343	5656624.76615352	0.865426	0.983458	87.6275	71.7311	0.0103027	0.00843372	12.8504	10.5192	0.053452	0.0437553	3671.54	3005.49	0.014788	0.0121053
fish oil	570873	479961.669696478	663644.737797394	0.990712	0.903358	58.8445	38.8052	0.00691859	0.00456249	8.62943	5.6907	0.0358946	0.0236708	2465.55	1625.91	0.00993061	0.00654877
oilseed oils	1.31348e+07	11010203.0027139	15353621.6285348	0.378042	0.268436	54.4445	27.7229	0.00640127	0.00325949	0	0	0	0	5795.61	2951.1	0.0233432	0.0118863
pulses	1.87487e+07	15705182.4267099	21809594.1802235	0.248807	0.168863	23.7133	11.5893	0.00278807	0.00136261	1.26434	0.617921	0.00525912	0.00257028	75.9692	37.1283	0.000305985	0.000149543
Total	9.34464e+08	7.83547e+08	1.09126e+09	0.171573	0.138495	893.881	531.932	0.105097	0.0625415	32.8121	21.9455	0.136484	0.0912836	14602.3	8918.28	0.0588144	0.0359205
Total (incl.also cereal replacmenet with crop residues)	9.34464e+08	7.83547e+08	1.09126e+09	0.351993	0.296708	1447.82	935.959	0.170226	0.110045	35.4384	27.3323	0.147408	0.11369	5132.89	4422.7	0.0206739	0.0178135
